# Supplementary material for: Design and synthesis of MoSe 2 /C composites for the high performance supercapacitor electrode material
Source: Research Square preprint supplement (doi:10.21203/rs.3.rs-7696299/v1), 2025-10-16
Supplement: Supplementary file 1 [file 8883c4a04bf3ee16b199ea29.docx]

**Design and synthesis of** **MoSe2/C composites for the high performance supercapacitor electrode material**

Sheng-xue Yana,b,c[[1]](#footnote-1)*, Han-sai Liu a,b, Zuo-hao Liub, Shao-hua Luo a,b,c, Qing Wang a,b,c, Ya-hui Zhanga,b,c, Xin Liu a,b,c, Jing Guoa,b,c[[2]](#footnote-2)*

a School of Materials Science and Engineering, Northeastern University, Shenyang 110819, People’s Republic of China.

b School of Resources and Materials, Northeastern University at Qinhuangdao, Qinhuangdao 066004, People’s Republic of China.

c HebeiKey Laboratory of Dielectric and Electrolyte Functional Material, Qinhuangdao 066004, People’s Republic of China.


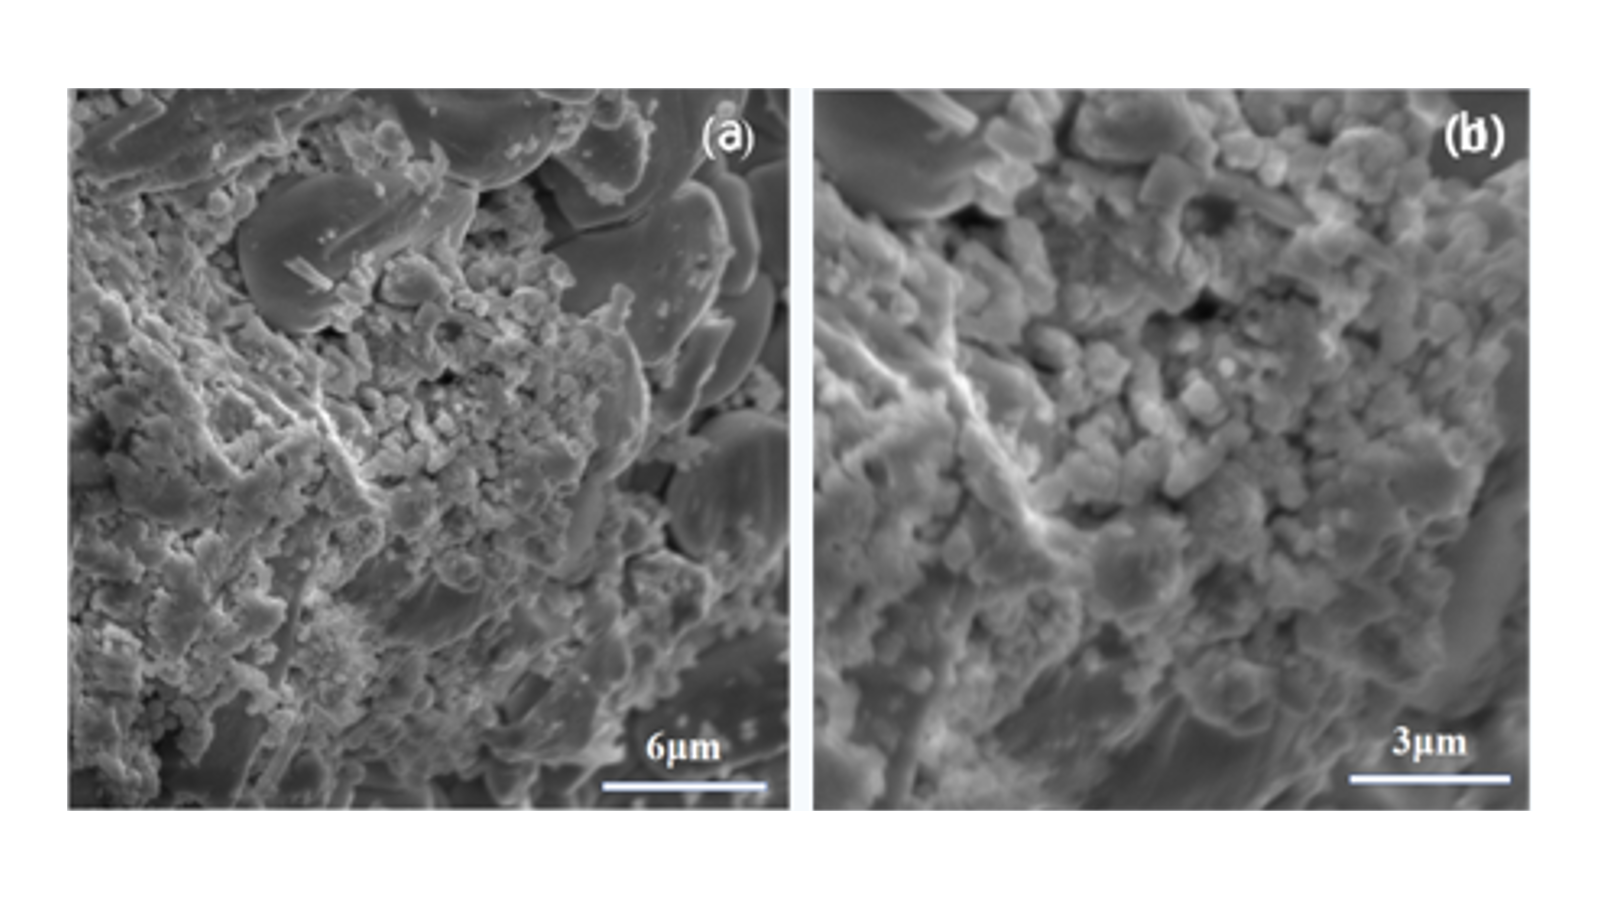


Fig. S1. SEM images of the product MoSe2 at different magnifications


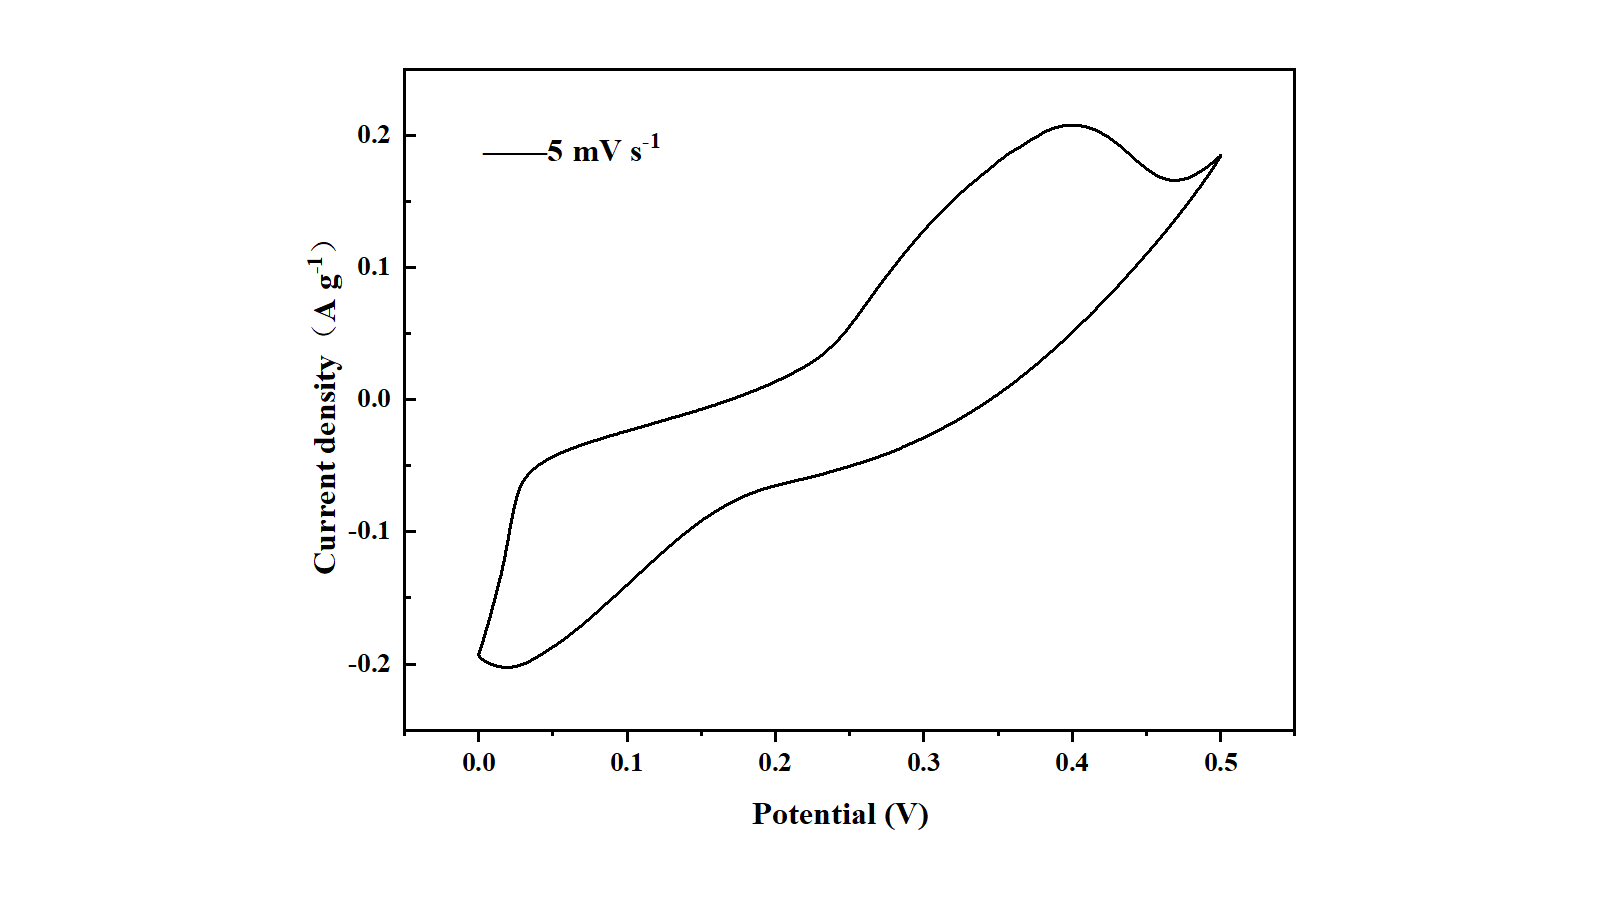


Fig. S2. Cyclic voltammogram (CV) profile of MoSe2 at 5 mV s-1 sweep rate


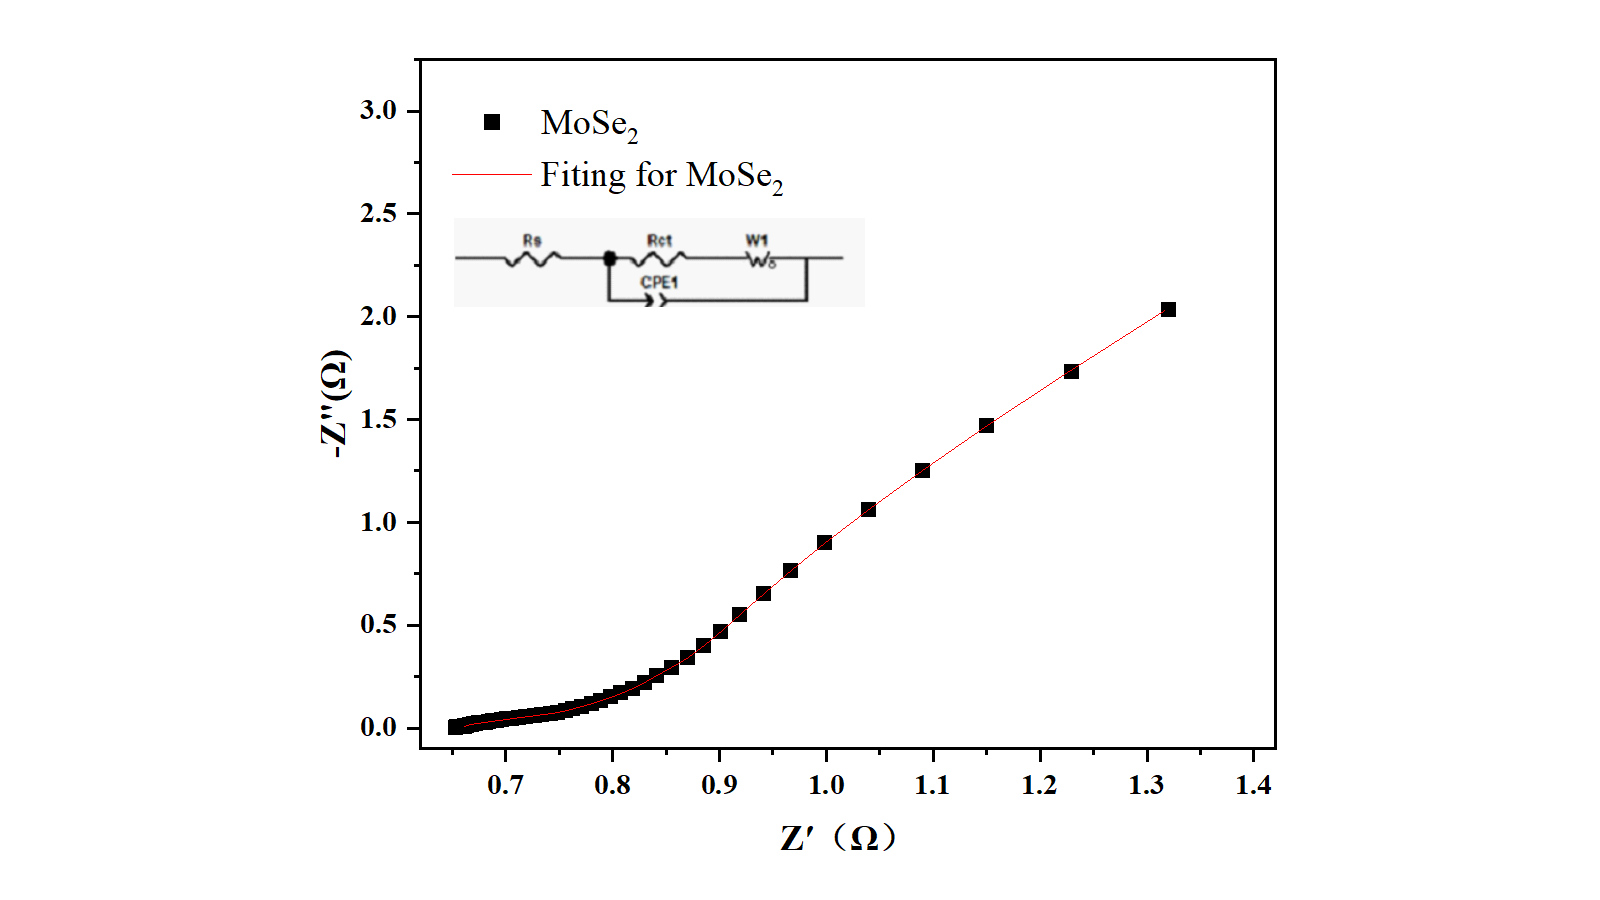


Fig. S3. MoSe2的三电极阻抗图

**
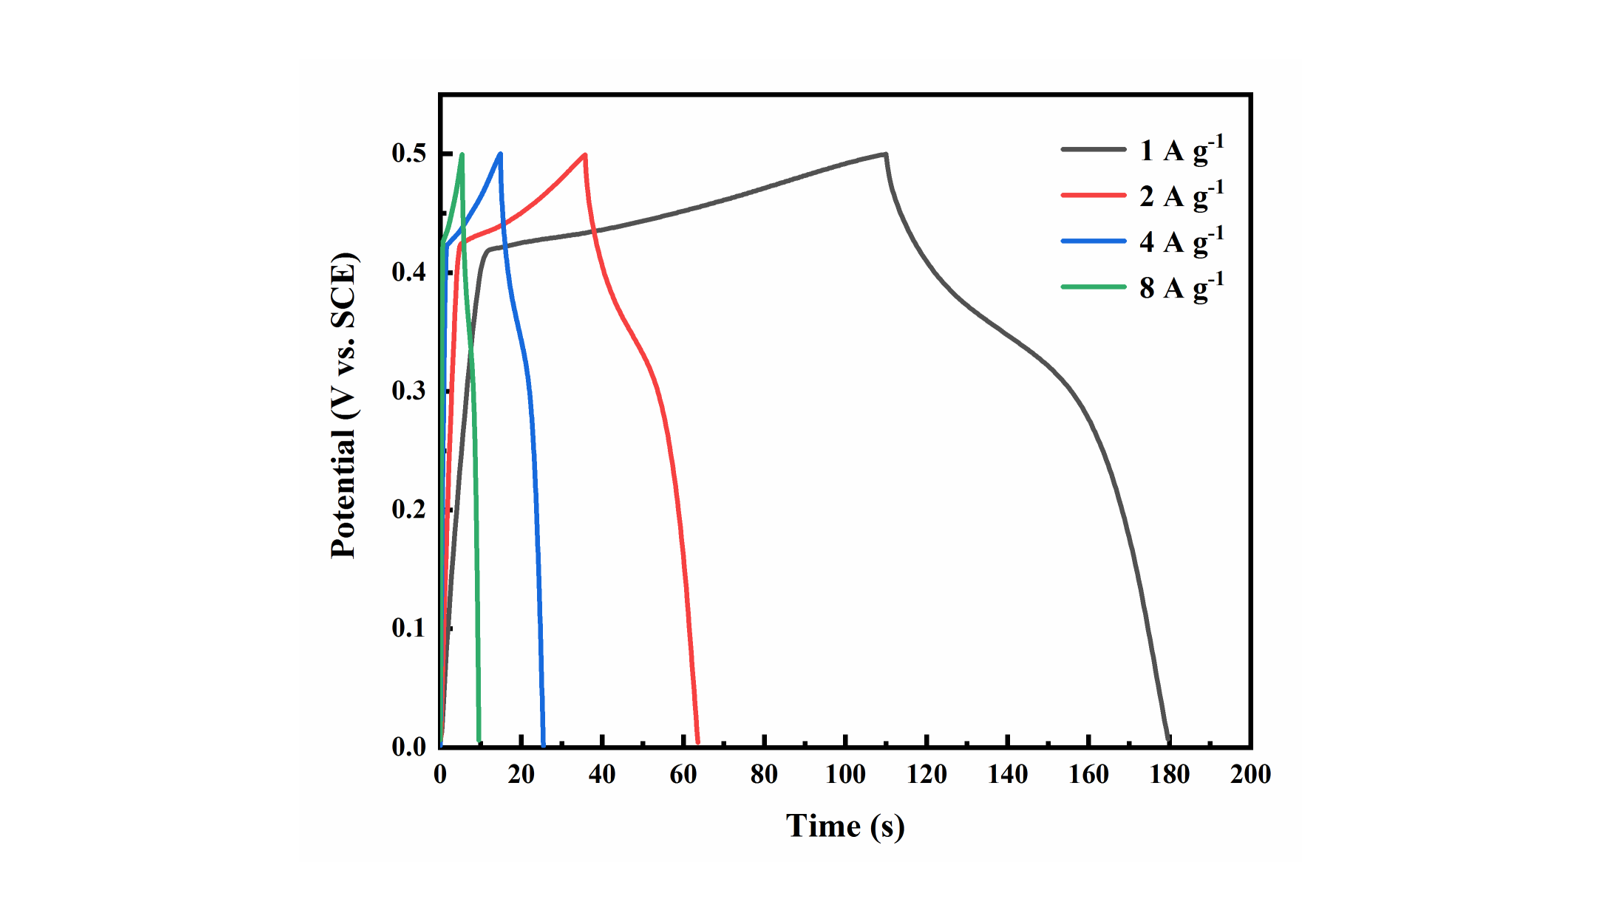
**

Fig. S4. Charge-discharge curves of MoSe2 at different current densities

**
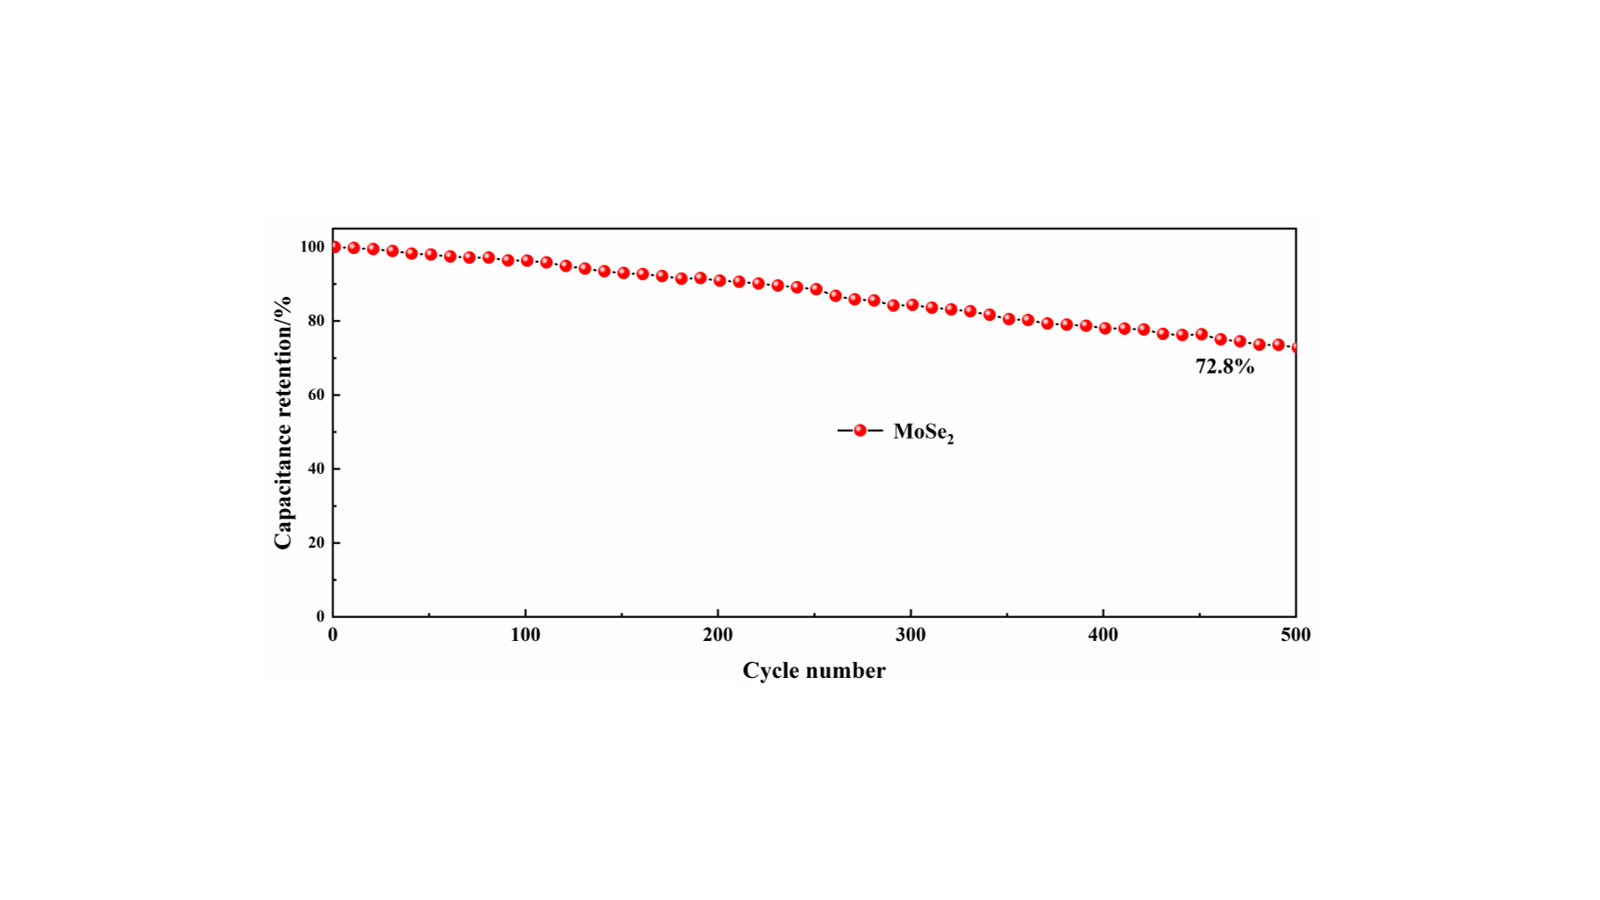
**

Fig. S5. MoSe2 long cycle capacity retention plot

**Table S1.** Comparison of the capacitive properties of MoSe2/C-1.0 composite films with other electrode materials reported in the literature.

| **Electrode materials** | **Specific capacitance** | **Electrolyte** | **Cycling stability** | **Ref.** |
| --- | --- | --- | --- | --- |
| MoSe2 | 198.90 F g-1 | 0.5 M H2SO4 | 75% after 10000 cycles | 1 |
| 2H-MoSe2 | 25.31 F g-1 | TEABF4/AN | 87% after 10000 cycles | 2 |
| NiSe@MoSe2 | 128.2 F g-1 | 2 M KOH | 93.7% after 1000 cycles | 3 |
| MoSe2-MWCNTS | 232 F g-1 | 1 M KOH | 93% after 1000 cycles | 4 |
| MoSe2/rGO | 169.3 F g-1 | 2 M KOH | 83.1% after 10000 cycles | 5 |
| MoSe2/C-1.0 | 235.85 F g-1 | 3 M KOH | 96.8% after 500 cycles | This work |

1. Balasingam S K, Lee J S, Jun Y. Few-layered MoSe 2 nanosheets as an advanced electrode material for supercapacitors[J]. Dalton Transactions, 2015, 44(35): 15491-15498.
2. Pazhamalai P, Krishnamoorthy K, Sahoo S, et al. Two-dimensional molybdenum diselenide nanosheets as a novel electrode material for symmetric supercapacitors using organic electrolyte[J]. Electrochimica Acta, 2019, 295: 591-598.
3. Peng H, Zhou J, Sun K, et al. High-performance asymmetric supercapacitor designed with a novel NiSe@ MoSe2 nanosheet array and nitrogen-doped carbon nanosheet[J]. ACS Sustainable Chemistry & Engineering, 2017, 5(7): 5951-5963.
4. Karade S S, Sankapal B R. Two dimensional cryptomelane like growth of MoSe2 over MWCNTs: symmetric all-solid-state supercapacitor[J]. Journal of Electroanalytical Chemistry, 2017, 802: 131-138.
5. Shui J, Bai B, Jiang X, et al. High-performance MoSe2/rGO composites based on interface and phase engineering for all-solid-state symmetric supercapacitors[J]. Electrochimica Acta, 2023, 469: 143257.

1. yanshengxueneu@163.com; [↑](#footnote-ref-1)
2. guojing@neuq.edu.cn. [↑](#footnote-ref-2)
